# Supplementary material
Source: MDPI journal article supplement (https://www.mdpi.com/2075-163X/7/9/169)
Supplement: s1 [file s1]

# Connecting the morphological and crystal structural changes during the conversion of lithium hydroxide monohydrate to lithium carbonate using multi-scale X-ray scattering measurements

Greeshma Gadikota

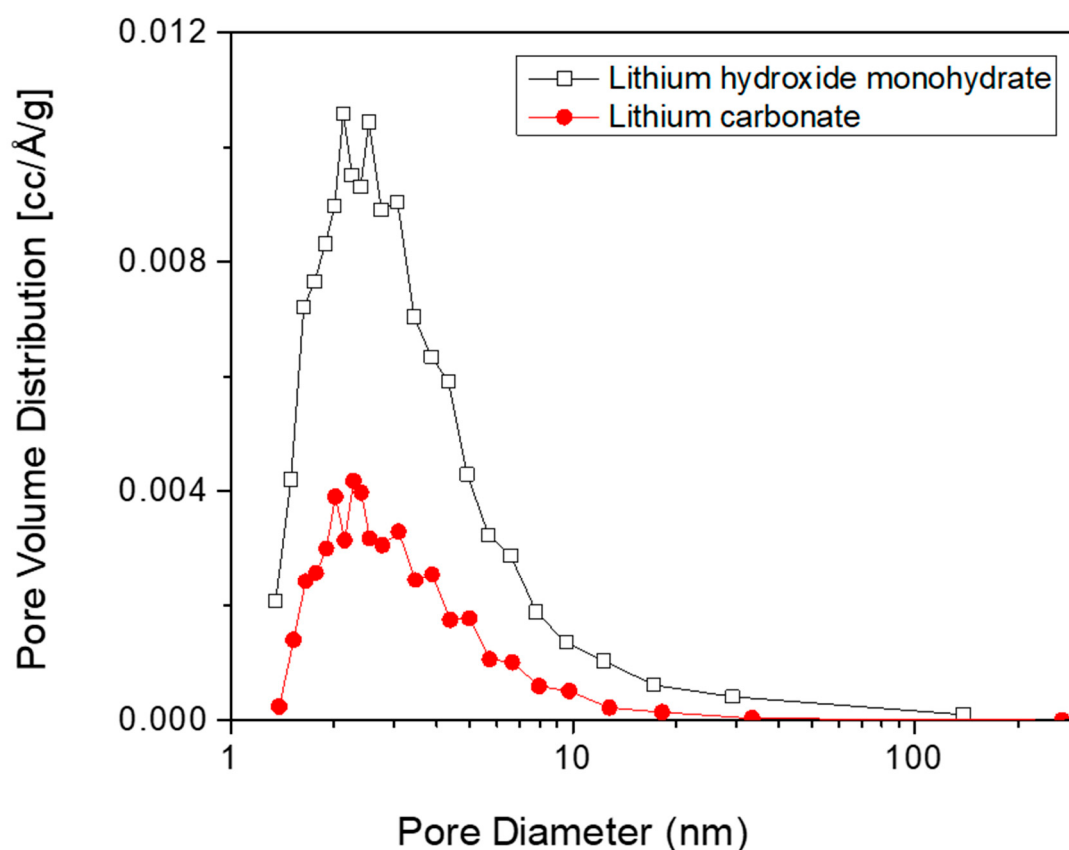

**Figure S1.** The pore volume distributions of lithium hydroxide monohydrate and lithium carbonate determined using the BET method.
